# Supplementary material for: Genetic dissection of black grain rice by the development of a near isogenic line
Source: PubMed Central journal article supplement — Breed Sci. 2014 Jun 1;64(2):134–41. doi: 10.1270/jsbbs.64.134 (PMC4065320; doi:10.1270/jsbbs.64.134), 2014-06-01
Supplement: 64_134_3.pdf [file 64_134_3.pdf]

**Supplemental Table 1.** Agronomic traits of the black rice NIL between 2009 and 2012

| Varieties   | Heading date <sup>a</sup><br>(m/d) | Culm length<br>(cm) | Panicle length<br>(cm) | Panicle number<br>(No./m <sup>2</sup> ) | 1000-grain weight<br>(g) | Weight of gross<br>brown rice (kg/a) |
|-------------|------------------------------------|---------------------|------------------------|-----------------------------------------|--------------------------|--------------------------------------|
| NIL         | 8/4**                              | 83.6                | 17.9                   | 355                                     | 22.2                     | 52.0                                 |
| Koshihikari | 8/2                                | 83.0                | 18.0                   | 348                                     | 22.6                     | 55.9                                 |

<sup>a</sup> \*\*: P < 0.01.
