# Supplementary figures and images for: Genetic dissection of black grain rice by the development of a near isogenic line
Source: PubMed Central journal article supplement — Breed Sci. 2014 Jun 1;64(2):134–41. doi: 10.1270/jsbbs.64.134 (PMC4065320; doi:10.1270/jsbbs.64.134), 2014-06-01

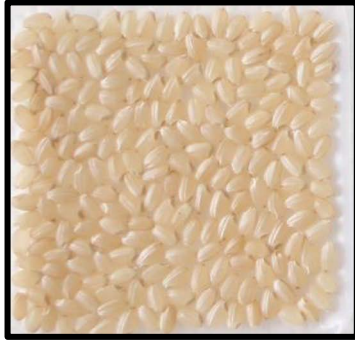

Koshihikari

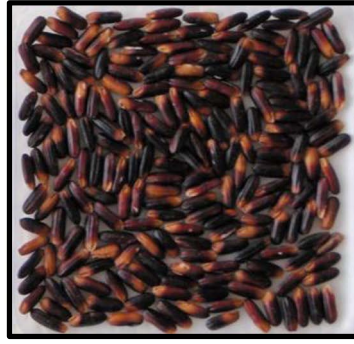

Hong Xie Nuo

**Supplemental Fig. 1.** Grain colors of parent varieties.

Supplement: 64_134_1.pdf [file 64_134_1.pdf]
